1 **Cooperation mitigates diversity loss in a spatially expanding microbial**  
2 **population**

3 Saurabh Gandhi, Kirill S. Korolev, Jeff Gore

4 **Abstract**

5 The evolution and potentially even the survival of a spatially expanding population depends on its  
6 genetic diversity, which can decrease rapidly due to a serial founder effect. The strength of the  
7 founder effect is predicted to depend strongly on the details of the growth dynamics. Here, we  
8 probe this dependence experimentally using a single microbial species, *Saccharomyces*  
9 *cerevisiae*, expanding in multiple environments that induce varying levels of cooperativity during  
10 growth. We observe a drastic reduction in diversity during expansions when yeast grows non-  
11 cooperatively on simple sugars, but almost no loss of diversity when cooperation is required to  
12 digest complex metabolites. These results are consistent with theoretical expectations. When cells  
13 grow independently from each other, the expansion proceeds as a pulled wave driven by the  
14 growth at the low-density tip of the expansion front. Such populations lose diversity rapidly  
15 because of the strong genetic drift at the expansion edge. In contrast, diversity loss is substantially  
16 reduced in pushed waves that arise due to cooperative growth. In such expansions, the low-  
17 density tip of the front grows much more slowly and is often reseeded from the genetically diverse  
18 population core. Additionally, in both pulled and pushed expansions, we observe a few instances  
19 of abrupt changes in allele fractions due to rare fluctuations of the expansion front and show how to  
20 distinguish such rapid genetic drift from selective sweeps.

21 **Keywords**

22 Range expansions | Cooperative growth | Serial founder effect | Genetic drift | Allee effect

## 23 **Significance statement**

24 Spatially expanding populations lose genetic diversity rapidly because of the  
25 repeated bottlenecks formed at the front as a result of the serial founder effect.  
26 However, the rate of diversity loss depends on the specifics of the expanding  
27 population, such as its growth and dispersal dynamics. We have previously  
28 demonstrated that changing the amount of within-species cooperation leads to a  
29 qualitative transition in the nature of expansion from pulled (driven by migration at  
30 the low density tip) to pushed (driven by migration from the high density region at  
31 the front, but behind the tip). Here we demonstrate experimentally that pushed  
32 waves, which emerge in the presence of sufficiently strong cooperation, result in  
33 strongly reduced genetic drift during range expansions, thus preserving genetic  
34 diversity in the newly colonized region.

## 35 **Introduction**

36 Spatial population expansions occur at multiple scales, from the growth of bacterial  
37 biofilms and tumors to the spread of epidemics across the globe (1–4). Natural  
38 populations often undergo range shifts or range expansions, in response to  
39 changing climate, and increasingly, following introduction into novel geographical  
40 areas due to trade, travel and other anthropogenic factors (5–7). The fate of these  
41 spatially expanding populations depends on their genetic diversity, which allows  
42 them to adapt to the new environment (8). The very process of spatial expansion is,  
43 however, predicted to erode the diversity of the population (9, 10), since the newly  
44 colonized territory is seeded by only a subset of the genotypes that exist in the  
45 original population. This phenomenon, known as the founder effect, greatly  
46 amplifies genetic drift in the population and leads to diversity loss and accumulation

47of deleterious mutations (11–13). Thus, a firm understanding of the founder effect is  
48necessary to predict and control the fate of expanding species. While diversity is  
49lost during all expansions, the rate of loss is expected to be strongly influenced by  
50the expansion dynamics, which depend on the details of dispersal and growth.  
51Depending on the expansion dynamics, population expansions can be classified into  
52two categories – pulled and pushed. In populations that do not exhibit any within-  
53species cooperation, the growth rate is maximum at low densities and decreases  
54monotonically as the density increases. In such populations, migrants at the low  
55density tip of the wave grow at the fastest rate, and drive the expansion into the  
56new area. Such expansions are called pulled waves, and their expansion velocity,  
57also known as the Fisher velocity, depends solely on the diffusion rate of the  
58individuals and the growth rate of the species at low density. On the other hand,  
59pushed waves occur in the presence of cooperative growth within the population  
60(i.e. positive density dependence of the growth rate, also known as the Allee effect)  
61whereby the tip grows at a much lower rate than the higher density bulk (14–17).  
62Since the growth rate at low density in such populations is lower than in the bulk,  
63the Fisher velocity for such populations is lower than the actual expansion velocity.  
64Although pulled and pushed waves are typically distinguished based on the growth  
65dynamics, a similar distinction can be drawn based on how the dispersal rate  
66depends on the population density (18).

67The difference in the dynamics of pulled and pushed waves has substantial genetic  
68consequences (19–21). In its simplest form, range expansions can be viewed as a  
69series of founding events, where a small subpopulation establishes a colony in a  
70new territory, grows rapidly, and then seeds the next founder population. This  
71series of population bottlenecks quickly erodes the genetic diversity in the

72population, a process aptly called the serial founder effect. The bottlenecks are less  
73severe for species with an Allee effect because growth in the low-density founding  
74colonies is subdued. Indeed, the slow growth of the founders provides sufficient  
75time for the arrival of migrants from the genetically diverse population bulk. Thus,  
76genetic diversity is predicted to persist much longer and over longer distances in  
77populations with an Allee effect (Fig. 1A).

78This differential rate of diversity loss in pulled and pushed waves is well-  
79characterized in a wide range of theoretical models (20–24), and has also been  
80observed empirically in field studies (25). However, it has been difficult to directly  
81connect the empirical observations to theory (25), in part because these natural  
82expansions cannot be replicated, and also because numerous environmental factors  
83cannot be well-controlled. Microcosm experiments have helped address this chasm  
84between theory and experiments by partially trading off realism for much better  
85controlled and replicable biological systems (26–30).

86Previous experiments with microbial colonies expanding on agar have  
87demonstrated both diversity eroding and diversity preserving range expansions (21,  
8831, 32). In these experiments, a colony is inoculated with two genotypes, and the  
89diversity loss manifests in the formation and coalescence of monoclonal sectors.  
90However, this sectoring phenomenon is lost when two different mutualist species  
91are inoculated together at the center instead of a single species. The sector  
92formation in the former case and its lack in the mutualists can be well-understood  
93mechanistically for this particular system in terms of the (microscopic) demographic  
94and geometrical properties of the expanding species. In contrast, in our current  
95study, we explore the differential rate of diversity loss more generally as a  
96consequence of growth demographics, independent of species-specific mechanisms.

97Using the framework of pulled and pushed waves, we performed experiments to  
98establish a general relationship between cooperativity in growth dynamics and the  
99strength of genetic drift. Our setup is an extension of a previously developed  
100experiment, where we demonstrated the transition from pulled to pushed waves  
101with increasing cooperation in yeast (33). To study genetic diversity, we introduced  
102two otherwise identical genotypes with different fluorescent markers, whose  
103frequency can be tracked over time. We find that yeast populations expanding as a  
104pulled wave undergo a drastic reduction in genetic diversity, unlike the same  
105population expanding as a pushed wave. Moreover, we quantify the rate of diversity  
106loss in terms of the effective population size, and show that the effective population  
107size correlates well with how pushed the expansion is (aka `pushedness`).

108We also observe a few evolutionary jackpot events during which one of the  
109genotypes abruptly increases in frequency. Such events are predicted to arise  
110naturally due to rare stochastic excursions of the expansion front ahead of its  
111expected position (34). Our results support this theory because abrupt changes in  
112allele frequency co-occur with substantial changes in front shape. Importantly, we  
113show that these evolutionary jackpot events can be distinguished from selective  
114sweeps, in which a new mutant rises to high frequency due to its higher fitness than  
115the ancestral population.

## 116**Results**

117The stepping-stone metapopulation model is widely used to describe the  
118spatiotemporal population dynamics in patchy landscapes (35, 36). In this model,  
119populations grow in discrete patches that are connected to nearest neighbor  
120patches via migration, which is reflected in our experimental setup. The budding

121 yeast, *S. cerevisiae*, expands in one dimension, along the rows of a 96-well plate,  
122 with cycles of growth, nearest-neighbor migration, and dilution into fresh media  
123 (Fig. 1B). At the beginning of every cycle, a fixed fraction ( $m/2$ ) of culture in each  
124 well is transferred into wells at adjacent locations on either side, while the  
125 remaining ( $1-m$ ) is transferred into the well at the same location (migration rate,  
126  $m = 0.4$ , unless stated otherwise). At the same time, the culture is also diluted  
127 into fresh media by a constant factor. After dilution, the cultures are allowed to  
128 grow for 4 hours before the cycle is repeated. Starting with a steep initial spatial  
129 density profile of yeast, this process leads to a stable wavefront (as defined in Fig.  
130 1A, Materials and Methods) that expands at a constant velocity (Fig. 2A).

131 Previous studies have shown that yeast typically do not display cooperative  
132 behavior when growing on simple sugars such as galactose or glucose, but grow  
133 cooperatively on sucrose (37). Thus, we expect pulled expansions in glucose and  
134 galactose and pushed expansions in sucrose. To compare the rate of genetic drift in  
135 different environments, we use two otherwise identical genotypes of the same  
136 strain, but with different constitutively expressed fluorescent markers, whose  
137 frequency can be tracked using flow cytometry. We start with a 1:1 ratio of the two  
138 strains in the initial density profile for the expansion experiment and observe the  
139 relative frequencies for about 100 cycles.

140 In the galactose environment, the relative frequencies of the two genotypes (as  
141 defined in Materials and Methods) change rapidly over the course of the spatial  
142 expansion, undergoing large fluctuations, occasionally leading to fixation of one of  
143 the genotypes. Twenty four replicate realizations of the experiment reveal that  
144 while the waves are nearly identical in terms of their velocity and wavefront shape,

145the internal dynamics of individual fractions is highly different (Fig. 2B). This can be  
146clearly seen from the variance in fractions across replicates (Fig. 2E), which grows  
147from 0 at the beginning of the experiment to the maximal value of 0.5. The  
148measured variance allows us to quantify the rate of diversity loss in terms of the  
149effective population size using the following relationship:

$$150 \text{var}(t) = f_0(1 - f_0) \left( 1 - \exp\left(\frac{-t}{N_{eff}}\right) \right) \quad (1)$$

151where  $\text{var}(t)$  is the variance in the fractions across replicates as a function of time,  
152 $f_0 = 0.5$  is the initial fraction at  $t = 0$ , and  $t$  is in the units of generation time  
153(cycles in this case, since the entire front is effectively diluted by 2x every cycle,  
154and so, each cycle corresponds to one generation). For the pulled waves in  
155galactose, the effective population size is approximately  $2^{10}$  – four orders of  
156magnitude smaller than the actual size of the population in the wavefront (Fig. 2E).  
157We thus see that there is a tremendous loss of genetic diversity during pulled  
158expansions.

159We repeat the same experiment, but now with yeast growing on sucrose, where we  
160expect growth to be cooperative and hence, the expansions to be pushed (33). The  
161expansion speed and bulk population density in sucrose is similar to that in  
162galactose (Fig. 2A). Yet, while the waves are physically similar, their effect on the  
163genetic diversity in the population is drastically different. The frequencies of the two  
164genotypes, starting at an equal 1:1 ratio, remain almost unchanged at the end of  
165the experiment (Fig. 2D). The diversity preserving nature of these pushed

166expansions is reflected in the large effective population size, estimated to be higher  
167than 15,000 – at least two orders of magnitude larger than in pulled waves (Fig. 2E).

168Drastically different effective population sizes in simple sugar galactose and  
169complex sugar sucrose are consistent with the theoretical expectations for pulled  
170and pushed waves. Expansions in glucose, however, show somewhat unexpected  
171dynamics. Because glucose is a simple sugar, we expect the expansions to be  
172pulled, and hence lose diversity quickly. However, the measured effective  
173population size in glucose is intermediate between that in galactose and sucrose  
174(Fig. 2C,E), i.e. diversity during glucose expansions is lost much faster than in  
175sucrose, but not quite as rapidly as in galactose.

176One possible explanation for this discrepancy is that expansions in glucose are  
177weakly pushed. In order to test this possibility, we quantify the pulled vs. pushed  
178nature of the expansions in all three media. Specifically, we measure the low-  
179density growth rate of our strains and their expansion velocity ( $DH$ , see Materials  
180and Methods). Pulled waves expand at the Fisher velocity, which is determined  
181solely by growth rate at low density and the migration rate, while pushed waves  
182expand at a velocity greater than the Fisher velocity. We define a ‘pushedness’  
183parameter as the ratio of the experimentally observed velocity to the Fisher  
184velocity, so that pushedness = 1 for pulled waves, and  $> 1$  for pushed waves.

185For galactose, the pushedness of the expansions is observed to be close to 1,  
186whereas that for sucrose is 2.3, clearly confirming that the galactose expansions are  
187pulled and the sucrose ones are pushed (Fig. 3A). Surprisingly, the pushedness for  
188glucose expansions is also greater than 1, suggesting that contrary to our naïve



189expectation, expansions in glucose are in fact not pulled. More careful  
190measurements of the growth profile of the DH strains in 0.2\% glucose reveal a very  
191tiny amount of cooperative growth at extremely low densities (below  $10^3$   
192cells/well), making them very weakly pushed (SI Fig. 1). While this Allee effect  
193might originate due to many possible factors such as collective pH modulation (38),  
194it is important to note that the emergent property of the wave, pushedness,  
195explains the decreased rate of diversity loss without the need to understand  
196species-specific growth mechanisms.

197We further probe the relationship between pushedness and the rate of diversity loss  
198experimentally, by repeating the expansion experiments in multiple environments  
199using two different pairs of strains (DH-RFP/DH-CFP and BY-RFP/BY-YFP). The  
200different strain-media combinations give rise to expansions spanning a broad range  
201of pushedness values (Fig. 3B). We find that the pushedness correlates well with the  
202effective population size during expansions (Fig. 3C). Broadly, for all instances of  
203pulled waves,  $N_{\text{eff}}$  was under 500, over four orders of magnitude below the actual  
204population size. Within the pushed waves, we find two regimes with very different  
205rates of diversity loss. In the weakly pushed regime, the effective population size  
206ranged between 500 and 4000. We thus see that even for pushed waves, if the  
207cooperativity is not strong enough, diversity can be lost quite rapidly. Finally, in the  
208strongly pushed regime, we observe very little genetic drift and can therefore only  
209set a lower bound on the effective population sizes (Materials and Methods), and the  
210lower bounds are at or over 15,000 (Fig. 3C). Overall, for populations with  
211approximately equal bulk densities (within a factor of 3), the rate of diversity loss is  
212seen to be strongly modulated by the pushedness.

213 Throughout our experiments, we observe a few instances where one of the  
214 genotypes appears to take over the population very rapidly. Fig. 4A shows two such  
215 rapid takeover events, which closely resemble evolutionary sweeps. However,  
216 during range expansions, such sweeps can also occur purely as a consequence of a  
217 rare reproduction or dispersal event. In the wild, a rare long-distance dispersal  
218 might establish a new population in an unoccupied territory near the front. When  
219 this nearly clonal population merges with the expanding front, the frequency of the  
220 dominant genotype in the front suddenly increases. This process, called the  
221 ‘embolism effect’ has been previously proposed in theoretical literature (24), and  
222 we found one instance of it in our experiments (SI Fig 2 top panel). In our  
223 experiments, rapid takeovers might also occur when a clump of cells of the single  
224 genotype is transferred over to the front of the wave, leading to increased  
225 frequency of that genotype in the front. As the expansion progresses, this increased  
226 frequency propagates through the entire front (Fig. 4B, top panel). Both examples  
227 above can be termed a jackpot event that occurs due to stochastic demography.

228 A completely different possibility is that a rapid increase in the frequency of a  
229 neutral allele is due to a selective sweep due to a mutation at another locus. We  
230 can distinguish the two via the excess migration at the front that accompanies  
231 jackpots but not selective sweeps. In Fig. 4B, we simulate a simple model of  
232 expansion to show how the wave front widens as a consequence of the excess  
233 migration. Wider fronts expand faster, so the wave speed increases transiently as  
234 well. Importantly, both the velocity and front width return to their mean values as  
235 the front returns to equilibrium. In contrast, evolution towards a higher growth rate  
236 (migration rate is fixed in our assay and cannot be selected for) leads to increased  
237 velocity, but decreased front width (front width of pulled waves  $\sim \frac{1}{\lambda}$ )

238  $\sqrt{r_0}$ , (14)). Moreover, in the case of selective sweeps, the trajectories in the  
239 velocity-front width space do not return to the previous mean, but rather settle at  
240 the new equilibrium. These differences allow us to distinguish between the two  
241 processes responsible for rapid takeover by a genotype.

242 The dynamics described above are confirmed in simulations, where, we follow the  
243 trajectory of a rapid takeover event in the state space (front width - velocity). For  
244 jackpots (no beneficial mutations allowed), we see the transient front widening  
245 accompanied by an increased velocity, before the trajectory returns to the mean  
246 front width and velocity (Fig. 4E). When a low rate for beneficial mutation rate is  
247 included in our simulations, we observe rapid extinctions of one of the neutral  
248 markers. The state space trajectories are, however, very different. After a selective  
249 sweep, they do not return to their previous locations; instead, they settle in the  
250 region of higher velocity and steeper fronts (Fig. 4E).

251 Among the rapid takeovers that we observe in experiments, a subset can be clearly  
252 seen to follow the selection template. Fig. 4D shows the state space trajectory for  
253 one replicate that putatively evolved to a higher growth rate (red trajectory,  
254 compare to a jackpot shown in blue), corresponding to the takeover trajectories  
255 shown in Fig. 4A. We observe these putative selective sweeps only in a single  
256 growth medium among several that we used in our experiments (SI Fig. 3). This  
257 medium was limiting in terms of an essential amino acid, and thus, is likely to apply  
258 a higher evolutionary pressure than the others. We also observe a few rapid  
259 takeover events that do not follow the selection template, but rather, look like  
260 jackpot events. Even though the time series of allele fraction look similar for  
261 selective sweeps and jackpot events (Fig. 4A), the two mechanisms can be clearly

262distinguished based on their state space trajectories (Fig. 4D). Given the rarity of  
263both jackpots and selective sweeps due to mutation, we do not have sufficient data  
264to explore and contrast them in great quantitative detail. The few instances of these  
265processes that we do observe are nevertheless fully consistent with theoretical  
266predictions and our simulations.

## 267**Discussion**

268In this study, we used a well-controlled laboratory microcosm setup to probe the  
269distinct evolutionary consequences of pulled and pushed expansions. We observed  
270the rapid loss of diversity due to the serial founder effect when yeast expanded as a  
271pulled wave, and a much more subdued loss of diversity when it expanded as a  
272pushed wave. Moreover, we explored environmental conditions that span different  
273levels of pushedness and saw found that the effective population size in the front is  
274strongly correlated with the pushedness of the expansion. Thus, our experiments  
275suggest that pushedness is a useful measure for predicting the rate of diversity loss  
276during range expansions.

277We also observed instances of unusually rapid take over by one of the genotypes. In  
278the amino-acid-limited media, the yeast evolved a higher growth rate, and the  
279takeover events were driven by selective sweeps. In other conditions, rapid  
280takeovers were instead due to rare demographic fluctuations. We were able to  
281distinguish the two by looking at the trajectories of the wavefronts in the state  
282space defined by velocity and front width.

283The extensive theoretical work on range expansions has led to other very  
284interesting predictions that could also be addressed using our experimental system.

285 One prediction pertains to the quantitative dependence of the effective population  
286 size on the actual population size of the wavefront (23). It has been established  
287 that, with growth and migration held fixed,  $N_{\text{eff}}$  scales linearly with  $N_{\text{bulk}}$   
288 in fully-pushed expansions, and  $N_{\text{eff}} \sim \log^3(N_{\text{bulk}})$  in pulled  
289 expansions. Moreover, in the presence of a very weak Allee effect, Birzu et al  
290 predict a third class of expansions that is intermediate between pulled and pushed,  
291 where  $N_{\text{eff}}$  scales with  $N_{\text{bulk}}$  as a sublinear power. We made an  
292 attempt to observe these different scaling relationships by varying the bulk  
293 population size in experiments in two different ways – by changing the total volume,  
294 and thus the population size, and by changing the amount of a limiting amino acid.  
295 Unfortunately, in the former case, the altered volume also altered the density-  
296 dependence of the growth, while in the latter case, the low amino acid condition led  
297 to evolution during expansion. We speculate that the expansions in glucose, where  
298 the loss of diversity is intermediate between galactose and sucrose, might in fact  
299 belong to the newly predicted third class of expansions. Modifying our assay to  
300 modulate the bulk density without changing growth properties would help resolve  
301 this speculation.

302 Demographic stochasticity and environmental noise have also been predicted to  
303 cause fluctuations in the position of the expansion front (23, 34), which are well  
304 described by simple diffusion. In pushed waves, the effects of demographic noise on  
305 front diffusion are predicted to be subdued, and front diffusion should largely reflect  
306 the environmental noise. The situation is different in pulled waves, where front  
307 diffusion due to demographic noise is predicted to be much more pronounced. We  
308 observed front diffusion in both pulled and pushed waves in our experiments, where  
309 the variance in front position remains constant for some initial period before it

310 starts increasing linearly with time (SI Fig. 4). Contrary to expectations, we do not  
311 find a significant quantitative difference in front diffusion in pulled vs. pushed  
312 waves. This negative result could be explained by the lack of a sufficiently long  
313 timeseries data or by the dominance of the environmental noise for both pulled and  
314 pushed expansions in our experimental setup.

315 Allee effects, or the inability of organisms to grow optimally at very low densities, is  
316 often considered to have a negative impact on populations. For instance, it leads to  
317 lower expansion velocities compared to the velocity if growth were not suppressed  
318 at the low density tip. However, in this study we demonstrate that the Allee effect  
319 can in fact have a very beneficial effect on the expanding population by helping  
320 preserve diversity as the population enters novel territories, where the diversity is  
321 especially critical for survival. Even a miniscule Allee effect at very low densities,  
322 such as we found in the glucose expansions, can go a long way in helping mitigate  
323 diversity loss. Perhaps such tiny Allee effects pervasive in many invading species  
324 explain the lower than predicted rates of diversity loss during their expansion.

## 325 **Materials and methods**

### 326 **Strains**

327 The expansion experiments were performed using two pairs of strains, BY-RFP/BY-  
328 YFP and DH-RFP/DH-CFP. The BY strains were derived from the haploid BY4741  
329 strain (mating type  $\text{a}$ , EUROSCARF, (39)). The BY-YFP strain has a yellow  
330 fluorescent protein expressed constitutively by the ADH1 promoter (inserted using  
331 plasmid pRS401 containing MET17). The BY-RFP strain has a red fluorescent protein  
332 inserted into the HIS3 gene using plasmid pRS303. The DH strains are the same as

333those used in Healey et al (40). They are derived from the diploid strain W303, with  
334the RFP/CFP strains harboring constitutively expressed fluorescent markers  
335integrated into the URA3 gene. This pair is auxotrophic to uracil.

### 336**Growth rate measurements and calculation of Fisher velocities**

337Growth rates for both strain pairs were measured independently for all media, in  
338growth conditions identical to the final expansion experiments. For each pair, the  
339two fluorescent strains were mixed in 1:1 ratio in log phase and the cultures were  
340diluted into a wide range ( $10^0$  cells/well to  $10^5$  cells/well) of initial cell  
341densities. They were then diluted 2x every 4 hours into fresh media. Initial and final  
342densities of each fluorescent strain for each dilution cycle were measured using flow  
343cytometry, and their growth rates as a function of cell density were derived from  
344these measurements. The data is shown in SI Fig. 1. Low density growth rates were  
345obtained by linear regression on the log of initial and final densities, for initial  
346densities under  $500$  cells/well. The Fisher velocities were then derived by  
347simulating expansions with logistic growth, with the fitted low density growth rate.  
348Uncertainty in Fisher velocities was obtained by bootstrapping.

### 349**Expansion experiments**

350All experiments were performed at  $30^\circ\text{C}$  in standard synthetic media (yeast  
351nitrogen base and complete supplement mixture), in  $200\text{-}\mu\text{L}$  batch culture in  
352BD Biosciences Falcon 96-well Microtest plates. Expansions occurred along the 12  
353well long rows of the plate. Migrations and dilutions were performed every 4 h using  
354the Tecan Freedom EVO 100 robot. Plates were not shaken during growth. Optical  
355densities were measured on the robot before every dilution cycle in the Tecan  
356Sunrise platereader with 600-nm light. Cell densities of individual fluorescent strains

357 were also measured every 6 cycles in the MacsQuant flow cytometer after dilution  
358 in phosphate buffered saline (PBS). All expansions started with a steep exponential  
359 initial density profile. Periodically during the expansion, the leftmost well (in the  
360 bulk of the wave, away from the wavefront) was discarded and the entire profile  
361 was shifted to the left, so as to create empty wells for further expansion to the right.  
362 It was ensured that the rightmost two wells were always at zero cell density so as to  
363 avoid any edge effects on the expansion.

#### 364 **Definition of front**

365 The `front' is defined as the region of the wave density profile that falls below a  
366 threshold density, set at  $0.2 \times N_{\text{bulk}}$ . `Fractions/frequency in the front'  
367 correspond to the fraction of red or green fluorescent cells added up over the entire  
368 front region as defined above. The location of the front is defined as the  
369 interpolated well position where the density profile crosses the threshold.

#### 370 **Lower bound on effective population size**

371 Equation 1, which quantifies the dependence of the effective population size on the  
372 rate at which variance in fractions across replicates increases, is used to estimate  
373 the effective population size in our analysis. However, for pushed expansions in  
374 sucrose, the variance in the measured fractions never increases significantly above  
375 given the uncertainties in fraction estimation. In this case, it is not possible to  
376 actually estimate the effective population size. However, the fact that after a given  
377 time  $T$ , the variance increases at most by the amount equal to the measurement  
378 uncertainty,  $V_{\text{min}}$ , sets a lower bound on the effective population size:



$$379 N_{eff, min} = -T / \ln \left( 1 - \frac{\text{var}_{min}(T)}{(f_0(1-f_0))} \right)$$

(2)

380 **Figure 1**

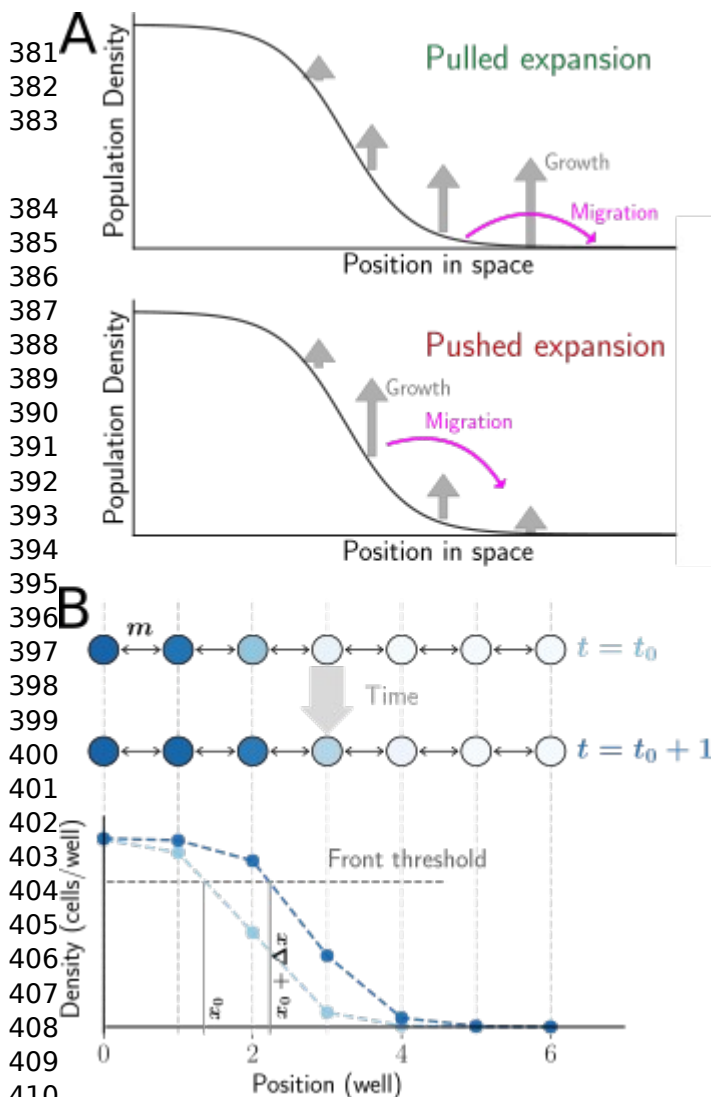

**Experimental setup to study genetic consequences of pulled and pushed range expansions.**

**A.** Range expansions can be broadly classified as pulled or pushed depending on the primary drivers of the expansion. In pulled expansions, the small number of founders from the tip of the expansion grow rapidly in the new territory (top panel). This founding population contains only a small subset of the total diversity in the population. Therefore, diversity is quickly eroded as the population expands into new area. Pushed waves are driven by migration out of the bulk, because the small density of founders at the front has a subdued growth rate (bottom panel). As a result, genetic diversity is maintained much longer. **B.** The experimental setup consists of yeast expanding in a discrete space, discrete time one-dimensional metapopulation landscape. Adjacent wells are connected via migration, and exchange a fixed fraction of cells,  $m$ , every cycle, and then grow for 4 hrs (top panel). This process results in an emergent wavefront of a fixed density profile moving to the right with a fixed velocity (bottom panel).

413 The location of the wavefront is determined as the interpolated well position where  
414 the density profile crosses a predetermined threshold. Velocity is then measured as  
415 the rate of advance of the wavefront location. The entire area to the right of the  
416 threshold location is defined as the 'front' for subsequent computation of genotype  
417 frequencies.

418

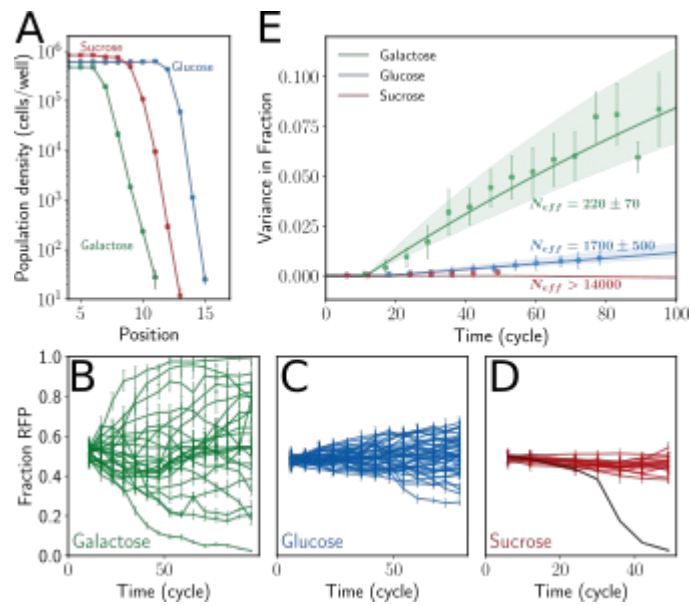

419 **Figure 2**

420 **Yeast expanding in different growth media loses diversity at very different**  
421 **rates even though the wavefronts have similar velocity and bulk density.**

422 **A.** Populations of *S. cerevisiae* growing in galactose, glucose, or sucrose media  
423 expand spatially as traveling waves with a constant velocity and exponentially  
424 decaying density at the front. The velocities, bulk population densities, and the  
425 shape of the front are similar in all three environments. **B.** Yeast expanding on  
426 galactose lose diversity most rapidly. Starting with equal initial frequencies of two  
427 genotypes that differ only in terms of a single fluorescent marker (RFP or CFP), the  
428 fraction of one of the genotypes in the front (RFP) fluctuates randomly until the  
429 genotype either reaches fixation or becomes extinct. The expansion experiments  
430 are replicated 24 times, and the dynamics of fractions varies by a large amount  
431 across replicates. **C, D.** The same experiments but in different media, glucose and  
432 sucrose, show very different rates of diversity loss. In glucose (**C**), the loss of  
433 diversity is much slower compared to the expansions in galactose. In sucrose (**D**),  
434 no significant loss of diversity is observed during the duration of the experiment (the  
435 replicate shown in grey was mis-pipeted in cycle 30, and hence diverges from the  
436 rest (SI Fig. 2 top row). This replicate is ignored in further analysis). **E.** The rate of  
437 diversity loss can be quantified in terms of the variance between the fractions  
438 across (Eqn. 1,  $f = 0.5$ ). In galactose and glucose, the variance increases  
439 significantly, allowing us to quantify the effective population size. In sucrose, the  
440 increase in variance is not statistically significant. Thus we can only set a lower  
441 bound on the effective population size. The drastic loss of diversity in galactose is  
442 reflected in the effective population size of the expanding front,  $\sim 220$ , over four  
443 orders of magnitude lower than the actual population size in the front. Effective size  
444 in glucose is around 1500, and that in sucrose is estimated to be over 15,000.

446 **Figure 3**

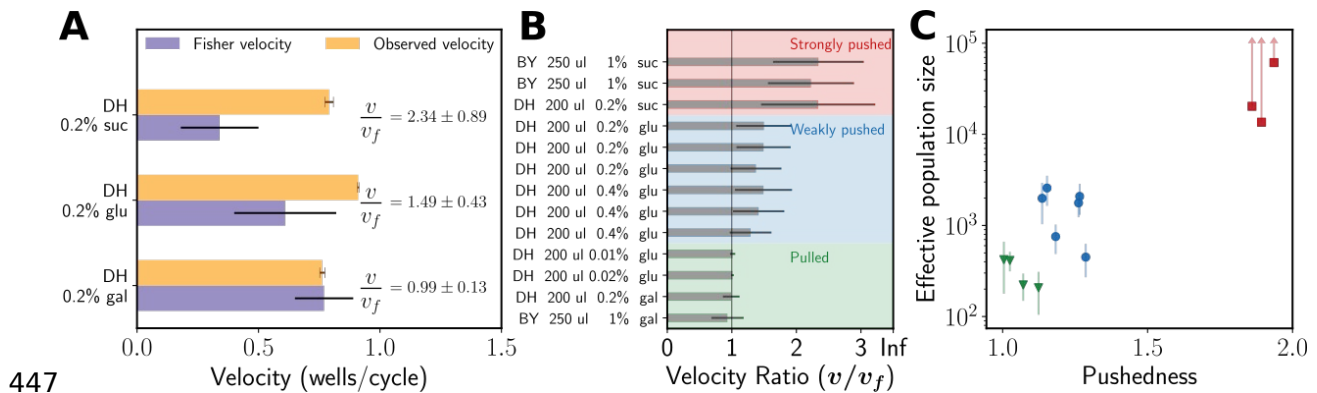

447 **The ratio of observed velocity to the Fisher velocity (termed pushedness)**  
 449 **determines the rate of diversity loss during expansions**

450 **A.** Pulled waves expand at the Fisher velocity, and have a pushedness of 1, whereas  
 451 pushed waves have pushedness larger than 1. Consistent with the observed rates of  
 452 diversity loss, the waves in galactose have pushedness = 1, and those in sucrose  
 453 have a much large pushedness of 2.3. Even though digestion of glucose is non-  
 454 cooperative, we found expansions in glucose to also be pushed although more  
 455 slightly than in sucrose. This explains the intermediate rate of diversity loss in  
 456 glucose compared to galactose and sucrose. **B.** We repeat the expansion  
 457 experiments across multiple environmental conditions (media, death rate, migration  
 458 rate), for two different pairs of yeast strains (BY and DH) and observe a wide range  
 459 of pushedness values for the different expansions. **C.** Effective population size is  
 460 plotted against the pushedness for the different strain-media combinations. We find  
 461 that  $N_{eff}$  correlates strongly with the pushedness (note the log scale).

462

## 463 Figure 4

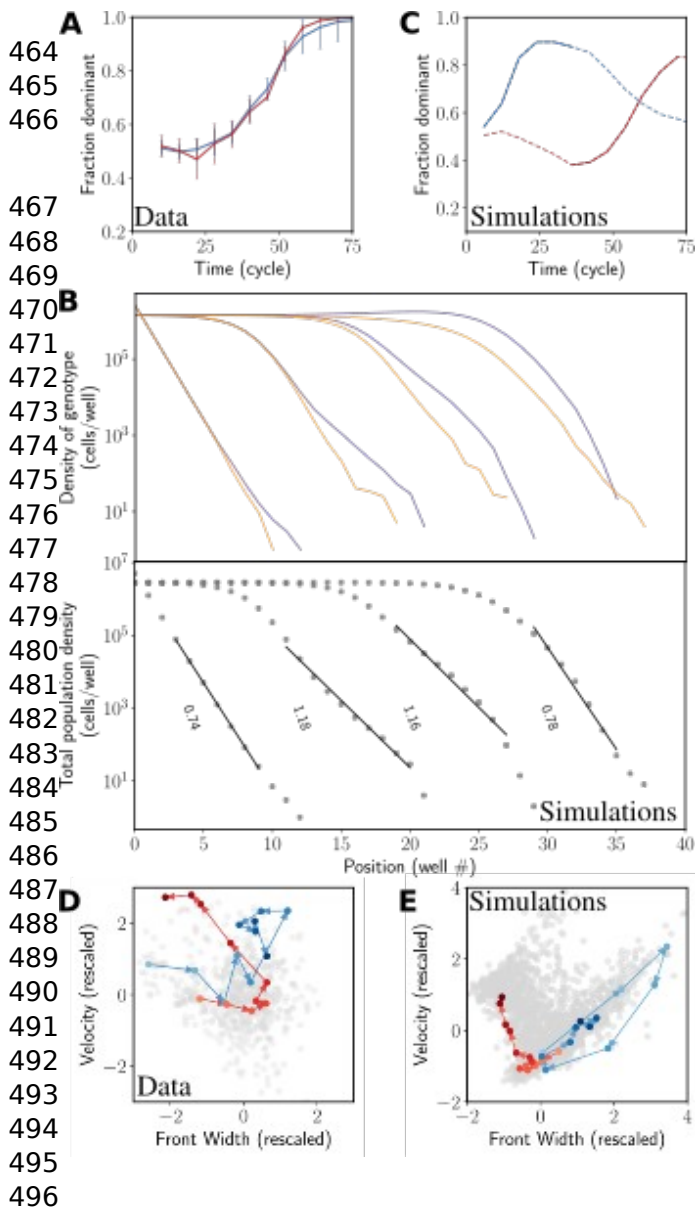

### Rapid takeover by one of the genotypes due to rare fluctuations of the front and selective sweeps.

**A.** In some instances of the expansion experiments, the fraction of one of the species is seen to increase very rapidly. The fraction of the species that eventually dominates is plotted as a function of time for two such instances.

**B.** During spatial expansions, rapid takeovers can occur without any selection, simply as a result of stochasticity in migration and growth, or rare long distance dispersal. The top panel shows the density of two genotypes in a simulation at different times. In an early cycle, at the very tip, stochasticity in migration led to excess colonization of the purple genotype in a well near the front (jackpot event). This fluctuation then propagated back towards the bulk as the purple genotype rapidly took over the front. Note how this process was accompanied by a transient widening of the front (bottom panel).

**C.** Two instances of rapid takeovers in simulations. The orange curve is from a simulation of a selective sweep during expansion, whereas the blue curve corresponds to a jackpot event. The dotted lines are the entire trajectory, and the solid sections correspond to

497 the takeover times that are analyzed further. **D, E.** Trajectories in the space of front

498 width and velocity for experiments (**D**) and simulations (**E**) from **A** and **B**. Each dot

499 corresponds to the front width and velocity at a single time point for one of the

500 replicates. The axes are rescaled so that the front width and velocity have mean 0

501 and standard deviation of 1; arrows indicate increasing times. During selective

502 sweep (orange curve in **E**), the trajectory initially fluctuates around the mean value

503 of the width and velocity, but, after the mutant establishes at the front, the

504 trajectory moves monotonically to the top left towards increasing velocity and

505 decreasing front width. In contrast, for the jackpot event (blue), the front width and

506 velocity transiently increase, but relax back towards their mean values at later

507 times. Although the timeseries of the fractions in experiments looks nearly identical

508 in the two instances shown, the state space trajectories are clearly distinct.

## 509References

1. Liu J, et al. (2015) Metabolic co-dependence gives rise to collective oscillations within biofilms. *Nature* 523(7562):550–554.
2. Korolev KS (2013) The Fate of Cooperation during Range Expansions. *PLoS Comput Biol* 9(3):e1002994.
3. Brú A, Albertos S, Luis Subiza J, García-Asenjo JL, Brú I (2003) The Universal Dynamics of Tumor Growth. *Biophys J* 85(5):2948–2961.
4. Brockmann D, Helbing D (2013) The Hidden Geometry of Complex, Network-Driven Contagion Phenomena. *Science* 342(6164):1337–1342.
5. Levine JM, D’Antonio CM (2003) Forecasting Biological Invasions with Increasing International Trade. *Conserv Biol* 17(1):322–326.
6. Walther G-R, et al. (2002) Ecological responses to recent climate change. *Nature* 416(6879):389–395.
7. Pateman RM, Hill JK, Roy DB, Fox R, Thomas CD (2012) Temperature-Dependent Alterations in Host Use Drive Rapid Range Expansion in a Butterfly. *Science* 336(6084):1028–1030.
8. Willi Y, Van Buskirk J, Hoffmann AA (2006) Limits to the Adaptive Potential of Small Populations. *Annu Rev Ecol Evol Syst* 37(1):433–458.
9. Excoffier L, Foll M, Petit RJ (2009) Genetic Consequences of Range Expansions. *Annu Rev Ecol Evol Syst* 40(1):481–501.
10. Korolev KS, Avlund M, Hallatschek O, Nelson DR (2010) Genetic demixing and evolution in linear stepping stone models. *Rev Mod Phys* 82(2):1691–1718.
11. Peischl S, Dupanloup I, Kirkpatrick M, Excoffier L (2013) On the accumulation of deleterious mutations during range expansions. *Mol Ecol* 22(24):5972–5982.
12. Gilbert KJ, Peischl S, Excoffier L (2018) Mutation load dynamics during environmentally-driven range shifts. *PLOS Genet* 14(9):e1007450.
13. Bosshard L, et al. (2017) Accumulation of Deleterious Mutations During Bacterial Range Expansions. *Genetics* 207(2):669–684.
14. van Saarloos W (2003) Front propagation into unstable states. *Phys Rep* 386(2–6):29–222.
15. Wang M-H, Kot M (2001) Speeds of invasion in a model with strong or weak Allee effects. *Math Biosci* 171(1):83–97.
16. Lewis MA, Kareiva P (1993) Allee Dynamics and the Spread of Invading Organisms. *Theor Popul Biol* 43(2):141–158.

17. Lewis MA, Petrovskii SV, Potts JR (2016) *The Mathematics Behind Biological Invasions* (Springer International Publishing, Cham) doi:10.1007/978-3-319-32043-4.
18. Birzu G, Matin S, Hallatschek O, Korolev KS (2019) Genetic drift in range expansions is very sensitive to density feedback in dispersal and growth. *bioRxiv*:565986.
19. Roques L, Garnier J, Hamel F, Klein EK (2012) Allee effect promotes diversity in traveling waves of colonization. *Proc Natl Acad Sci* 109(23):8828–8833.
20. Garnier J, Giletti T, Hamel F, Roques L (2012) Inside dynamics of pulled and pushed fronts. *J Mathématiques Pures Appliquées* 98(4):428–449.
21. Müller MJ, Neugeboren BI, Nelson DR, Murray AW (2014) Genetic drift opposes mutualism during spatial population expansion. *Proc Natl Acad Sci* 111(3):1037–1042.
22. Garnier J, Lewis MA (2016) Expansion Under Climate Change: The Genetic Consequences. *Bull Math Biol* 78(11):2165–2185.
23. Birzu G, Hallatschek O, Korolev KS (2018) Fluctuations uncover a distinct class of traveling waves. *Proc Natl Acad Sci* 115(16):E3645–E3654.
24. Bialozyt R, Ziegenhagen B, Petit RJ (2006) Contrasting effects of long distance seed dispersal on genetic diversity during range expansion. *J Evol Biol* 19(1):12–20.
25. Keller SR, Olson MS, Silim S, Schroeder W, Tiffin P (2010) Genomic diversity, population structure, and migration following rapid range expansion in the Balsam Poplar, *Populus balsamifera*. *Mol Ecol* 19(6):1212–1226.
26. Amor DR, Montañez R, Duran-Nebreda S, Solé R (2017) Spatial dynamics of synthetic microbial mutualists and their parasites. *PLOS Comput Biol* 13(8):e1005689.
27. Melbourne BA, Hastings A (2009) Highly Variable Spread Rates in Replicated Biological Invasions: Fundamental Limits to Predictability. *Science* 325(5947):1536–1539.
28. Ratzke C, Gore J (2016) Self-organized patchiness facilitates survival in a cooperatively growing *Bacillus subtilis* population. *Nat Microbiol* 1(5):16022.
29. Gokhale S, Conwill A, Ranjan T, Gore J (2018) Migration alters oscillatory dynamics and promotes survival in connected bacterial populations. *Nat Commun* 9(1):5273.
30. Weber MF, Poxleitner G, Heibisch E, Frey E, Opitz M (2014) Chemical warfare and survival strategies in bacterial range expansions. *J R Soc Interface* 11(96):20140172.

31. Hallatschek O, Hersen P, Ramanathan S, Nelson DR (2007) Genetic drift at expanding frontiers promotes gene segregation. *Proc Natl Acad Sci* 104(50):19926–19930.
32. Momeni B, Brileya KA, Fields MW, Shou W (2013) Strong inter-population cooperation leads to partner intermixing in microbial communities. *eLife* 2:e00230.
33. Gandhi SR, Yurtsev EA, Korolev KS, Gore J (2016) Range expansions transition from pulled to pushed waves as growth becomes more cooperative in an experimental microbial population. *Proc Natl Acad Sci* 113(25):6922–6927.
34. Brunet E, Derrida B, Mueller AH, Munier S (2006) Phenomenological theory giving the full statistics of the position of fluctuating pulled fronts. *Phys Rev E* 73(5):056126.
35. Colizza V, Pastor-Satorras R, Vespignani A (2007) Reaction–diffusion processes and metapopulation models in heterogeneous networks. *Nat Phys* 3(4):276–282.
36. Datta MS, Korolev KS, Cvijovic I, Dudley C, Gore J (2013) Range expansion promotes cooperation in an experimental microbial metapopulation. *Proc Natl Acad Sci* 110(18):7354–7359.
37. Gore J, Youk H, van Oudenaarden A (2009) Snowdrift game dynamics and facultative cheating in yeast. *Nature* 459(7244):253–256.
38. Ratzke C, Gore J (2018) Modifying and reacting to the environmental pH can drive bacterial interactions. *PLOS Biol* 16(3):e2004248.
39. Celiker H, Gore J (2012) Competition between species can stabilize public-goods cooperation within a species. *Mol Syst Biol* 8:621.
40. Healey D, Axelrod K, Gore J (2016) Negative frequency-dependent interactions can underlie phenotypic heterogeneity in a clonal microbial population. *Mol Syst Biol* 12(8):877.



## 510Supplementary Information

511SI Fig. 1: Density dependence of growth rate and fits for low density growth rate for  
512different strain-media combinations. Seven pairs of plots are shown for 7 different  
513strain-media combinations. In each pair, the left plot shows the instantaneous  
514growth rate from each measurement of initial and final densities over a 4 hr period.  
515The right panel shows the raw initial and final densities at the beginning and end of  
516the 4 hr periods on a log scale. Growth rate can be estimated from the right panels  
517by fitting a straight line over the region of interest (shown in white). The fitting  
518region is chosen so that only growth at low density is considered (actual density <  
519~2000 cells/well). We also exclude very low density data (measured density < ~50  
520cells/well) from fitting because of the very high sampling noise introduced when  
521measuring at extremely low densities (note that the actual cell density is obtained  
522by multiplying the measured cell density by the dilution factor used for  
523measurement; cells need to be diluted into a buffer because very high densities  
524cannot be measured in the flow cytometer, and it is difficult to have different  
525dilution factors for each well). Uncertainties in growth rates are obtained by  
526bootstrapping.

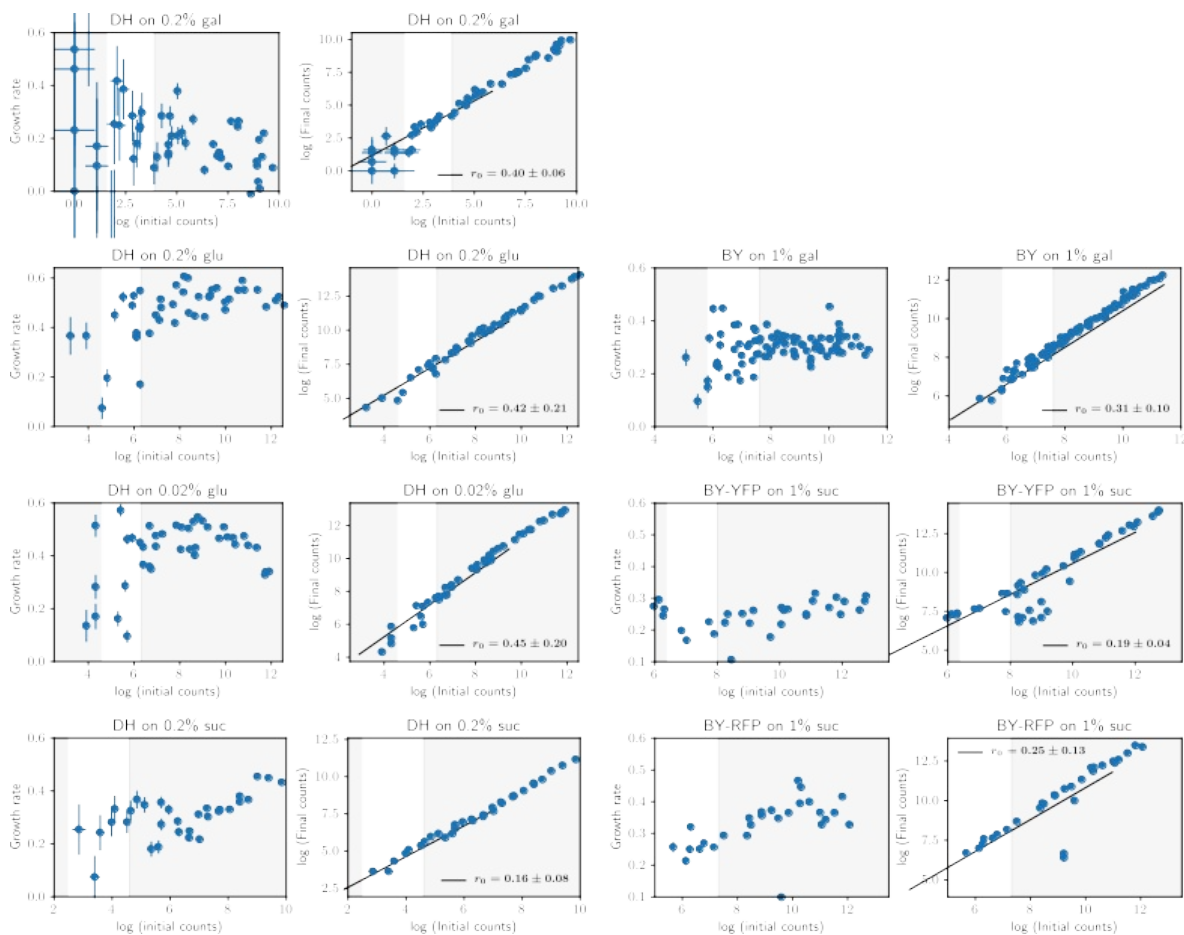

528SI Fig. 2: Jackpots in experiments. Jackpots are rare events where stochasticity in  
529migration leads to the front elongating at the very tip, leading to rapid change of  
530fractions of the genotypes. The figure shows 4 instances of jackpots in our  
531experiments. Left panel shows the trajectory of the experiment in the front width-  
532velocity state space. For jackpots, such trajectories transiently move to (or start  
533from) the top right but eventually move back towards the mean (transient  
534elongation of the front accompanied by increased velocity). The right panels show  
535the specific replicate that underwent a jackpot event, compared to the rest of the  
536replicates in the same experiment.

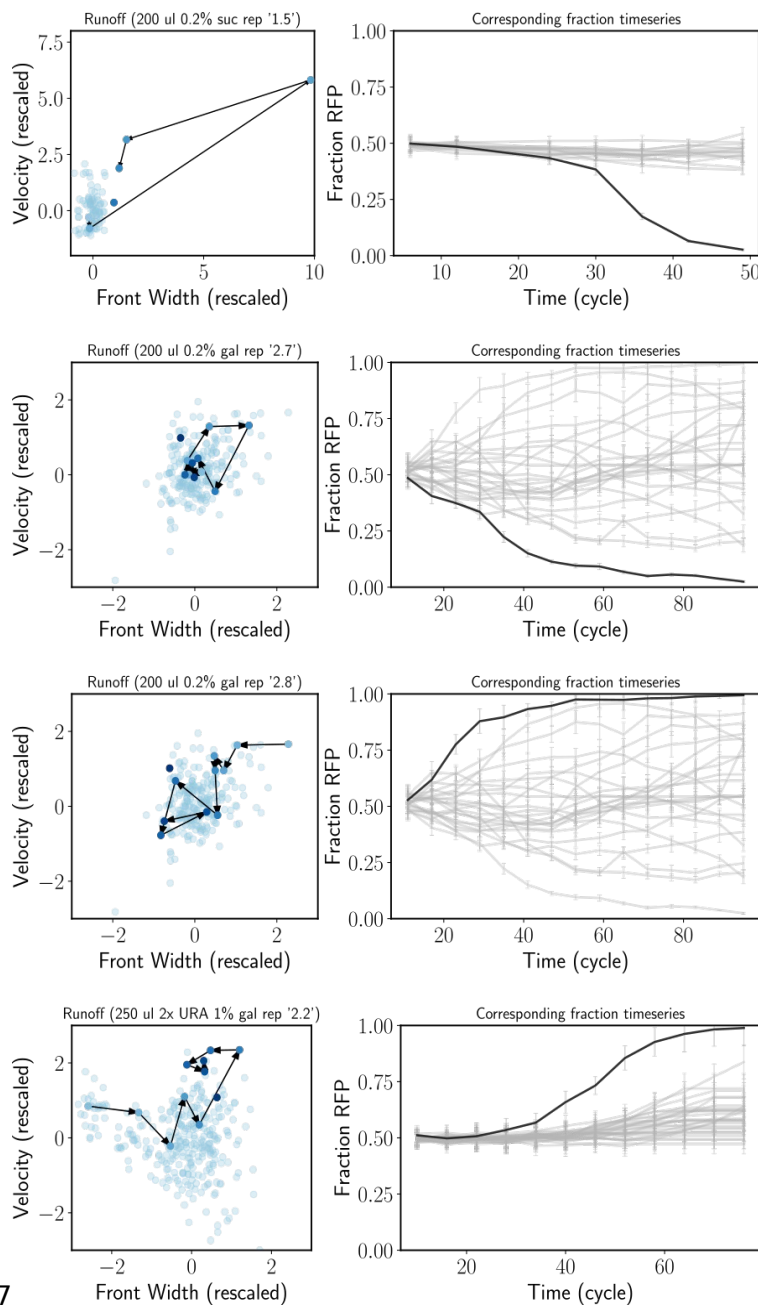

538SI Fig. 3: All evolution state space diagrams. Similar to jackpot events, when a  
539faster growing mutant appears in the front, the mutant fraction again increases  
540quickly. However, in contrast to jackpots, where the state space trajectories relax  
541back to equilibrium values, for selective sweeps, the front width decreases and the  
542velocity increases permanently, leading to trajectories that move to the top left in  
543the state space diagram and stay there. The figure shows 6 instances of selective  
544sweeps observed in our experiments.

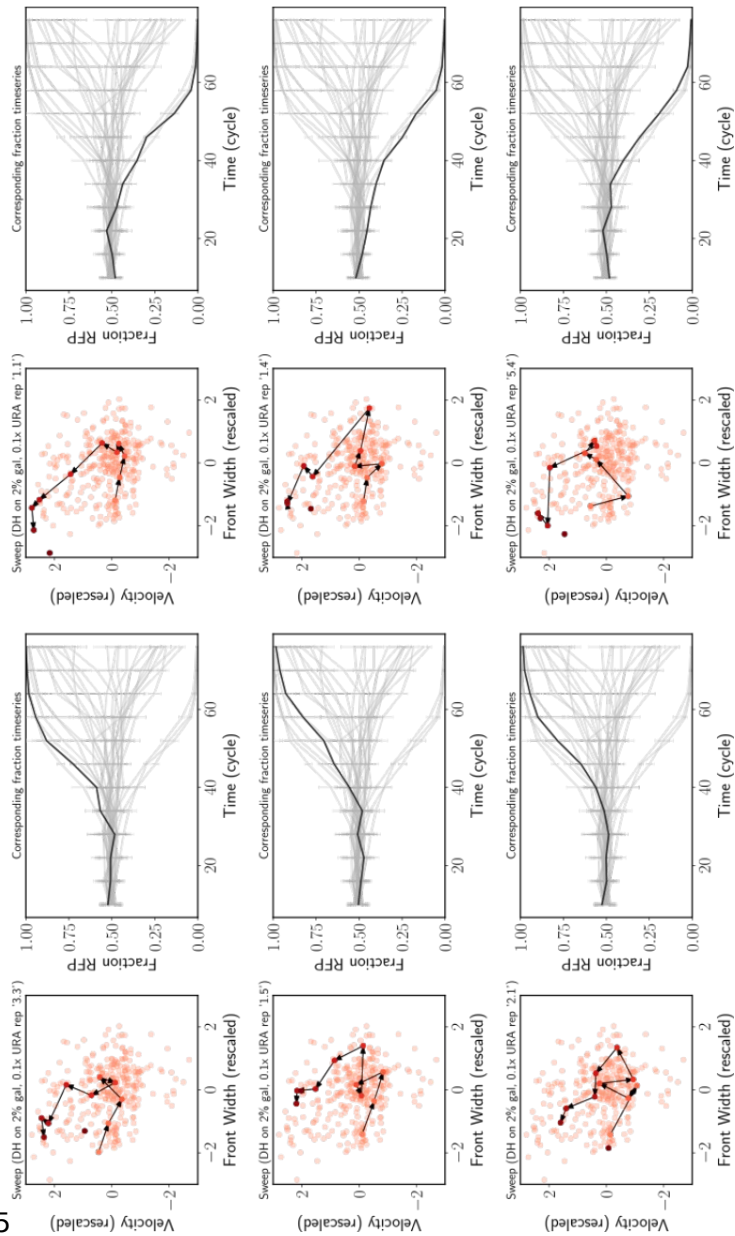

546SI Fig. 4: Front diffusion figure. The expansion wavefront is known to diffuse around  
547its mean position as the population expands. The diffusion coefficient is determined  
548by the intrinsic demographic stochasticity in the population as well as the  
549environmental noise. Pulled waves are predicted to be dominated by intrinsic  
550stochasticity, and typically diffuse more around the mean compared to pushed  
551waves, where front diffusion is predicted to be dominated by environmental noise.  
552However, in our experiments, we did not find a significant difference in pulled and  
553pushed waves, suggesting that the diffusion of the front is dominated by  
554environmental noise in both cases, induced by the sampling noise in migration and  
555dilution.

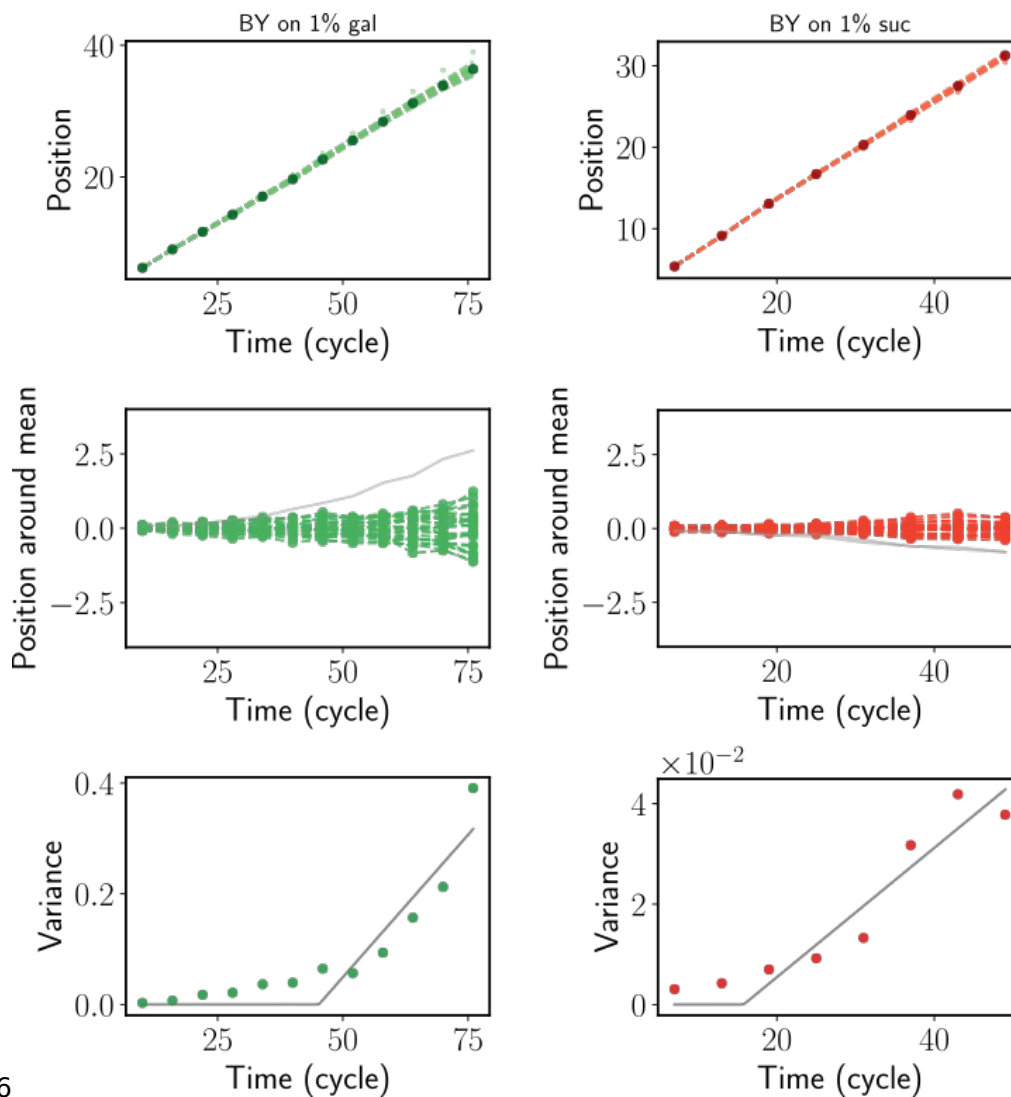

556

557

558SI Table 1: Growth rates and Fisher velocities for different strain-media combinations

| <b>Strain, Media</b>     | <b>Growth Rates</b>            | <b>Fisher Velocities (m, df)</b>       |
|--------------------------|--------------------------------|----------------------------------------|
| DH, 0.2% galactose       | 0.4 +/- 0.06 hr <sup>-1</sup>  | 0.78 +/- 0.12 wells/cycle (0.4, 2)     |
| DH, 0.2% glucose         | 0.42 +/- 0.21 hr <sup>-1</sup> | 0.60 +/- 0.23 wells/cycle (0.3, 2)     |
|                          |                                | 0.72 +/- 0.25 wells/cycle (0.5, 2)     |
|                          |                                | 0.70 +/- 0.19 wells/cycle (0.25, 1.33) |
|                          |                                | 0.64 +/- 0.22 wells/cycle (0.25, 1.54) |
| DH, 0.02% glucose        | 0.45 +/- 0.2 hr <sup>-1</sup>  | 0.64 +/- 0.26 wells/cycle (0.4, 2)     |
| DH, 0.2% sucrose         | 0.16 +/- 0.08 hr <sup>-1</sup> | 0.34 +/- 0.16 wells/cycle (0.4, 2)     |
| BY, 1% galactose, 2x URA | 0.31 +/- 0.1 hr <sup>-1</sup>  | 0.51 +/- 0.16 wells/cycle (0.3, 2)     |
| BY-YFP, 1% sucrose       | 0.19 +/- 0.04 hr <sup>-1</sup> | 0.30 +/- 0.17 wells/cycle (0.3, 2)     |
| BY-RFP, 1% sucrose       | 0.23 +/- 0.11 hr <sup>-1</sup> | 0.37 +/- 0.16 wells/cycle (0.3, 2)     |
